# Supplementary material for: A reversible fluorescent chemosensor for the rapid detection of mercury ions (ii) in water with high sensitivity and selectivity
Source: Royal Society of Chemistry journal article supplement (doi:10.1039/c4ra09961c), 2014-11-14
Supplement: c4ra09961c1.pdf [file c4ra09961c1.pdf]

*Electronic Supplementary Material*

A reversible fluorescent chemosensor for the  
rapid detection of mercury ions (II) in water  
with high sensitivity and selectivity

YuanRong Zhu, Hui Li, BingBing Shi, WenJuan Qu, YouMing

Zhang, Qi Lin, Hong Yao, TaiBao Wei\*

-----  
E-mail: weitaibao@126.com  
-----

*Key Laboratory of Eco-Environment-Related Polymer Materials,  
Ministry of Education of China; Key Laboratory of Polymer  
Materials of Gansu Province; College of Chemistry and  
Chemical Engineering, Northwest Normal University, Lanzhou,  
Gansu, 730070. P. R. China*

## CONTENTS

|                                                                                                                                  |    |
|----------------------------------------------------------------------------------------------------------------------------------|----|
| 1. General Methods .....                                                                                                         | 3  |
| 2. Determination of association constant .....                                                                                   | 4  |
| 3. Synthesis of sensor <b>Z</b> <sub>1</sub> .....                                                                               | 4  |
| 4. <sup>13</sup> C NMR spectra of compound <b>Z</b> <sub>1</sub> .....                                                           | 6  |
| 5. The single-crystal structures of the sensor <b>Z</b> <sub>1</sub> .....                                                       | 7  |
| 6. The UV–vis spectroscopy of <b>Z</b> <sub>1</sub> with Hg <sup>2+</sup> .....                                                  | 8  |
| 7. The Fluorescence Responses of <b>Z</b> <sub>1</sub> with Metal ions .....                                                     | 9  |
| 8. Time-dependent Fluorescence Change of <b>Z</b> <sub>1</sub> with Hg <sup>2+</sup> .....                                       | 10 |
| 9. A plot of fluorescence intensity Change of <b>Z</b> <sub>1</sub> with Hg <sup>2+</sup> .....                                  | 11 |
| 10. Fitting curve of emission intensity with concentration.....                                                                  | 12 |
| 11. Determination of Detection Limit of Hg <sup>2+</sup> .....                                                                   | 13 |
| 12. Influence of pH on <b>Z</b> <sub>1</sub> and Hg <sup>2+</sup> .....                                                          | 14 |
| 13. The response of <b>Z</b> <sub>1</sub> to heavy metal ions in the pH range of<br>6.0 to 7.0 .....                             | 15 |
| 14. The response of <b>Z</b> <sub>1</sub> to heavy metal ions in the pH range of<br>8.0 to 9.0 .....                             | 16 |
| 15. IR spectra of compound <b>Z</b> <sub>1</sub> and <b>Z</b> <sub>1</sub> +Hg <sup>2+</sup> .....                               | 17 |
| 16. ESI-MS spectrum of <b>Z</b> <sub>1</sub> .....                                                                               | 18 |
| 17. ESI-MS spectrum of <b>Z</b> <sub>1</sub> +Hg <sup>2+</sup> complex.....                                                      | 19 |
| 18. The Fluorescence Intensity Changes of <b>Z</b> <sub>1</sub> in the Presence of<br>Hg <sup>2+</sup> and Br <sup>-</sup> ..... | 20 |

**1. General Methods:** Fresh double distilled water was used throughout the experiment. All reagents and solvents were commercially available at analytical grade and were used without further purification.  $^1\text{H}$  NMR spectra were recorded on a Mercury-400BB spectrometer at 400 MHz and  $^{13}\text{C}$  NMR spectra were recorded on a Mercury-400BB spectrometer at 150 MHz. Chemical shifts are reported in ppm down field from tetramethylsilane (TMS,  $\delta$  scale with solvent resonances as internal standards). Melting points were measured on an X-4 digital melting-point apparatus. Infrared spectra were performed on a Digilab FTS-3000 FT-IR spectrophotometer. Mass spectra was recorded on an esquire 6000 MS instrument equipped with an electrospray (ESI) ion source and version 3.4 of Bruker Daltonics Data Analysis as the data collection system.

All fluorescence spectra were recorded on a Shimadzu RF-5301 fluorescence spectrometer after the addition of perchlorate metal salts in water, while keeping the ligand concentration constant ( $2.0 \times 10^{-5}\text{M}$ ). The excitation wavelength was 343 nm. Solutions of metal ions were prepared from the perchlorate salts of  $\text{Fe}^{3+}$ ,  $\text{Ag}^+$ ,  $\text{Hg}^{2+}$ ,  $\text{Ca}^{2+}$ ,  $\text{Cu}^{2+}$ ,  $\text{Co}^{2+}$ ,  $\text{Ni}^{2+}$ ,  $\text{Fe}^{2+}$ ,  $\text{Cd}^{2+}$ ,  $\text{Pb}^{2+}$ ,  $\text{Al}^{3+}$ ,  $\text{Zn}^{2+}$ ,  $\text{Cr}^{3+}$  and  $\text{Mg}^{2+}$ .

For  $^1\text{H}$  NMR titrations, two stock solutions were prepared in

DMSO- $d_6$ , one containing the sensor  $Z_1$  and the second containing an appropriate concentration of the metal ion. Aliquots of the two solutions were mixed directly in NMR tubes.

## 2. Determination of association constant

The association constants ( $K_a$ ) were calculated based on the fluorescent titration curve of the probes with ions. Association constants were determined by a nonlinear least squares fit of the data with the following equation as referenced elsewhere.<sup>1</sup> Where  $x$  is  $I-I_0/I_{max}-I_0$ ,  $y$  is the concentration of metal ions,  $a$  is the association constant, and  $b$  is the concentration of sample.

$$y = (x/(2 \times a \times b \times (1-x)^2) + ((x \times b)/2)$$

## 3. Synthesis of sensor $Z_1$

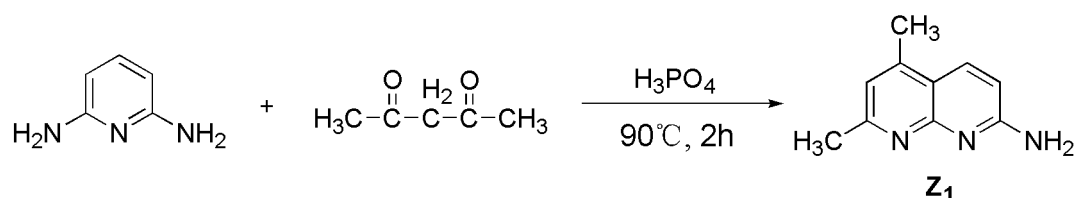

**Scheme S1** Synthesis of the sensor molecule  $Z_1$ .

A mixture of 2, 4-pentanedione (0.50 mL, 4.85 mmol) and 2, 6-diaminopyridine (0.50 g, 4.58 mmol) in phosphoric acid (2.50 mL) were heated at reflux for 2 hours. After cooling to room temperature, the resulting mixture was neutralized; the solid formed was collected by vacuum filtration, and washed with cool water ( $3 \times 5$  mL) and dried in vacuo. The crude product was

recrystallized from ethanol by slow evaporation to give a pale yellow solid. Yield: 0.33g (41%); m.p: 226-227 °C; <sup>1</sup>H NMR (400 MHz, CDCl<sub>3</sub>) δ 7.96 (d, *J* = 8.8 Hz, 1H), 6.87 (s, 1H), 6.67 (d, *J* = 8.8 Hz, 1H), 5.00 (s, 2H), 2.58 (s, 3H), 2.50 (s, 3H); <sup>13</sup>C NMR (150 MHz, CDCl<sub>3</sub>) δ 161.96, 159.68, 156.94, 145.42, 135.08, 120.35, 115.80, 111.97, 25.85, 18.34; IR (KBr, cm<sup>-1</sup>) ν: 3398, 3310 (-NH<sub>2</sub>), 1641 (C=N); ESI-MS *m/z*: (M+H)<sup>+</sup> Calcd for C<sub>10</sub>H<sub>11</sub>N<sub>3</sub> 174.0987; Found 174.0970; Anal. Calcd for C<sub>10</sub>H<sub>11</sub>N<sub>3</sub>: C, 69.34; H, 6.40; N, 24.26; Found C 69.27; H, 6.58; N, 24.15.

#### 4. $^{13}\text{C}$ NMR spectra of compound $\text{Z}_1$

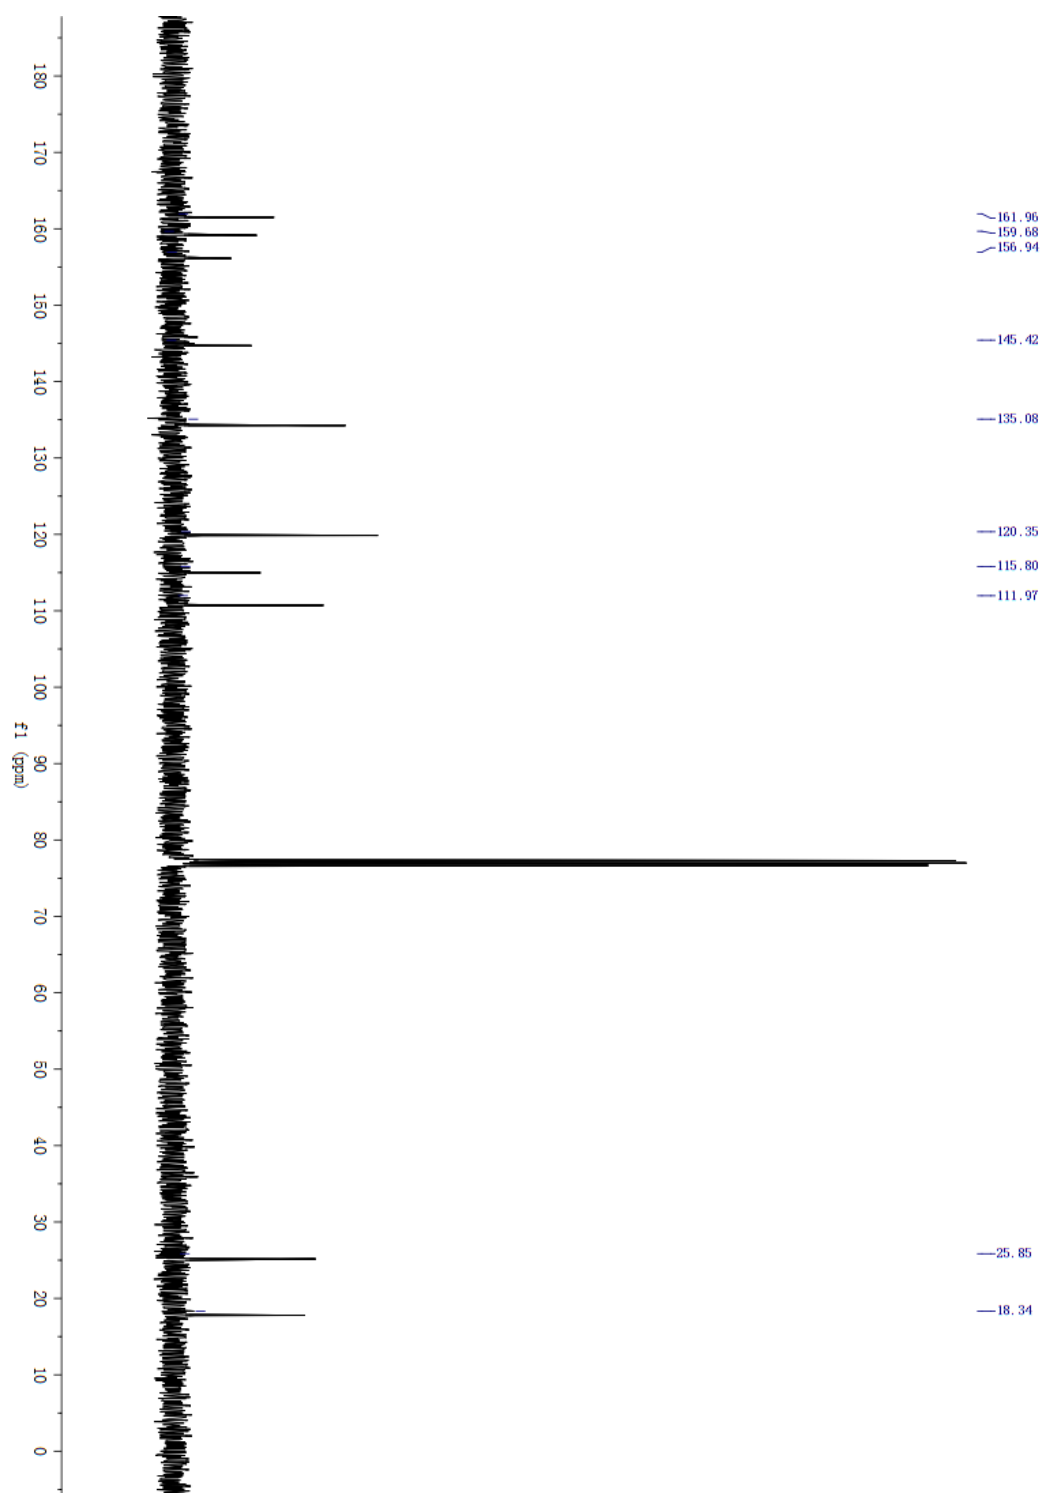

Figure S1  $^{13}\text{C}$  NMR spectra of compound  $\text{Z}_1$ .

## 5. The single-crystal structures of the sensor $Z_1$

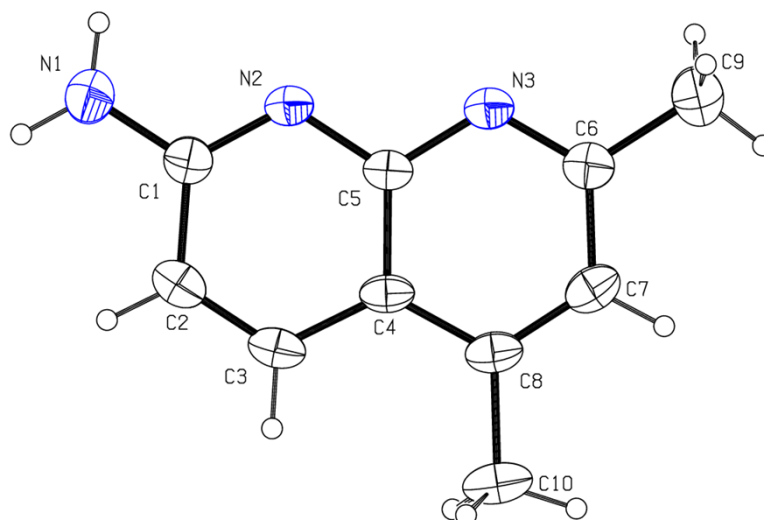

**Figure S2** Single-crystal X-ray structure of sensor  $Z_1$ .

## 6. The UV-vis spectroscopy of $Z_1$ with $Hg^{2+}$

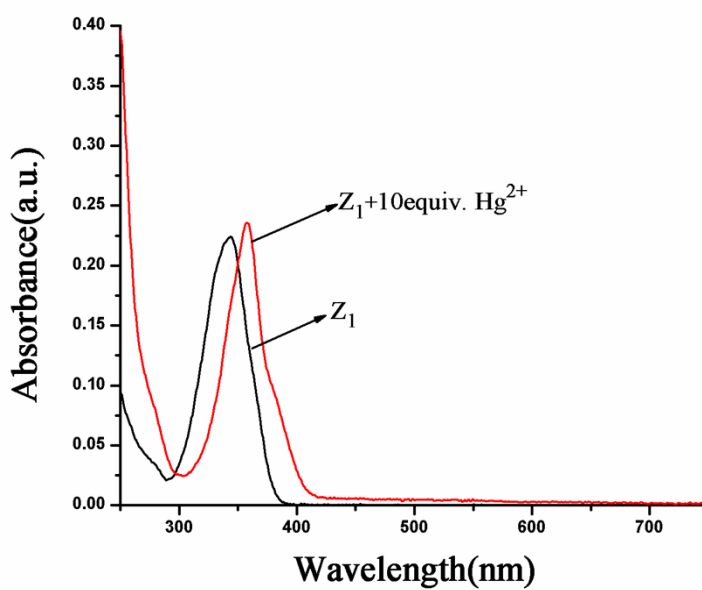

**Figure S3** UV-vis spectra of compound  $Z_1$  (20  $\mu$ M) in water upon addition of 10 equiv. of  $Hg^{2+}$ .



## 7. The Fluorescence Responses of $Z_1$ with Metal ions

(a)

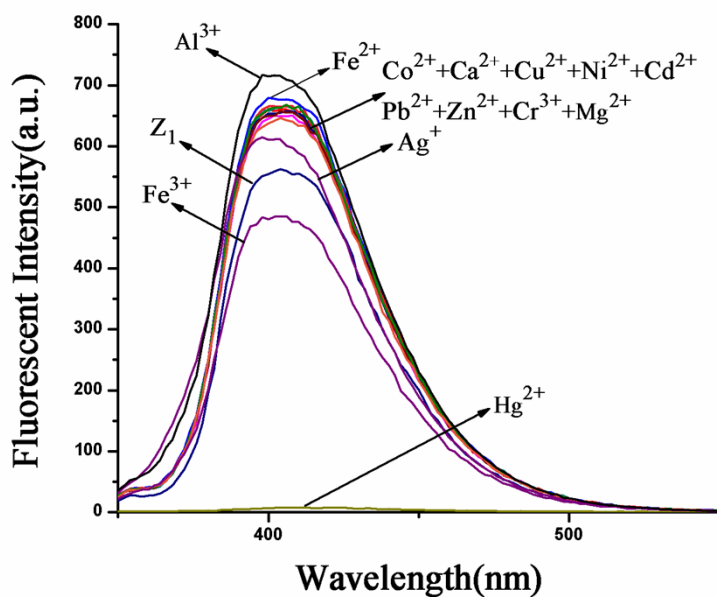

(b)

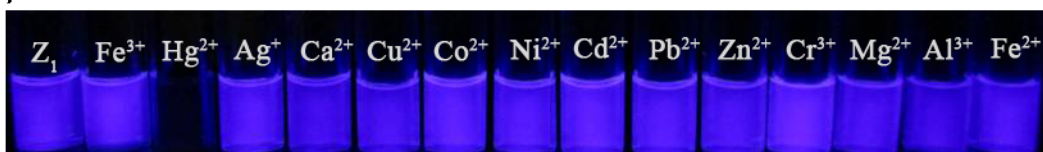

**Figure S4** (a) Fluorescence emission data for a 1:10 mixture of  $Z_1$  (20  $\mu$ M) and different metal ions, as their perchlorate salts, in water. ( $\lambda_{ex} = 343$  nm). (b) Visual fluorescence emissions of sensor  $Z_1$  after the addition of various metal ions (10 equiv.) in water on excitation at 365 nm using UV lamp.

## 8. Time-dependent Fluorescence Change of $Z_1$ with $Hg^{2+}$

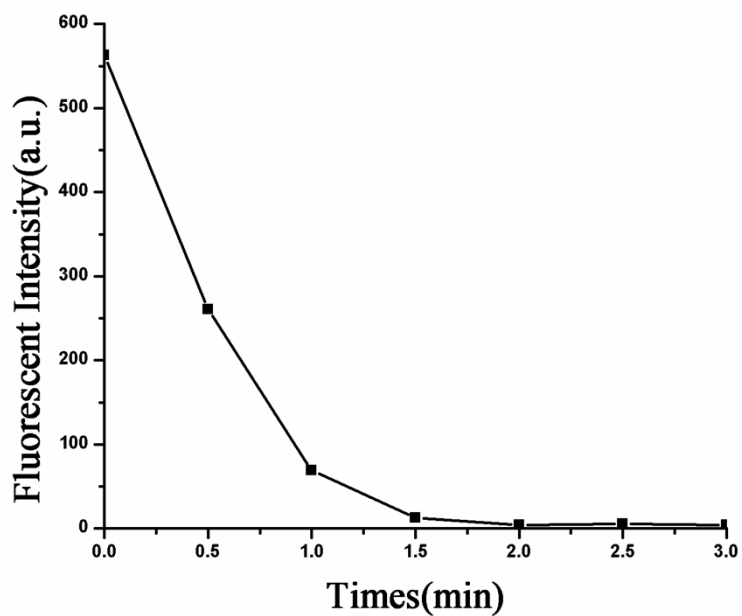

**Figure S5** Time-dependent fluorescence change of  $Z_1$  (20  $\mu$ M) in the presence of 10 equiv. of  $Hg^{2+}$  in water. Fluorescence intensity changes: each spectrum was recorded after 0, 0.5, 1.0, 1.5, 2.0, 2.5 and 3 minutes.

## 9. A plot of fluorescence intensity Change of Z<sub>1</sub> with Hg<sup>2+</sup>

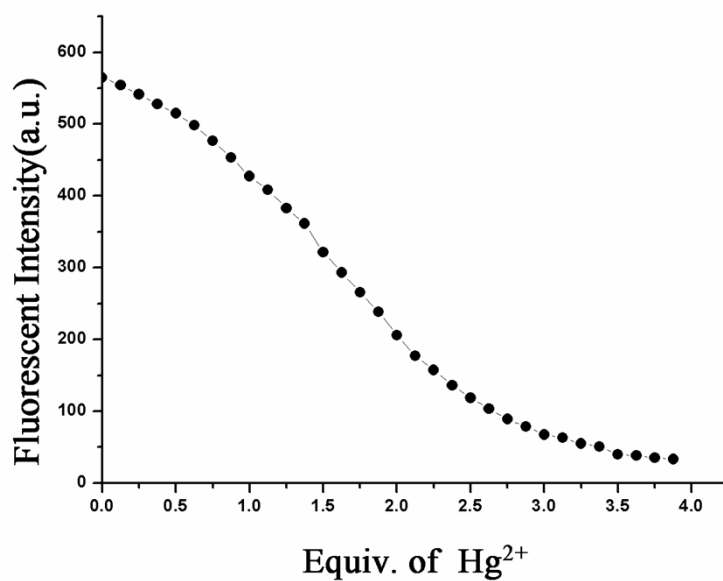

**Figure S6** A plot of fluorescence intensity depending on the concentration of Hg<sup>2+</sup> in the range from 0 to 5.28 equivalents.

## 10. Fitting curve of emission intensity with concentration

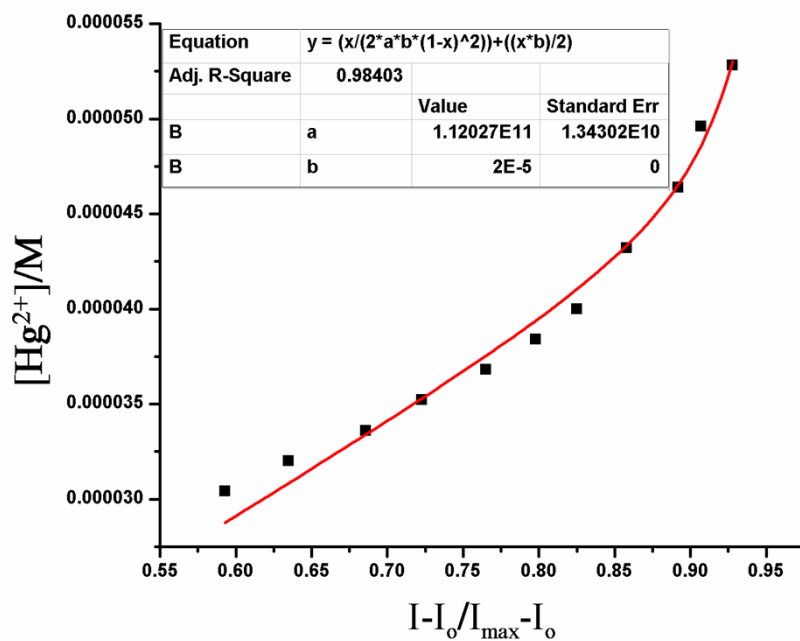

**Figure S7** Non-linear least square fitting of intensity vs concentration of  $\text{Hg}^{2+}$  using 2:1 complex model.

## 11. Determination of Detection Limit of $\text{Hg}^{2+}$

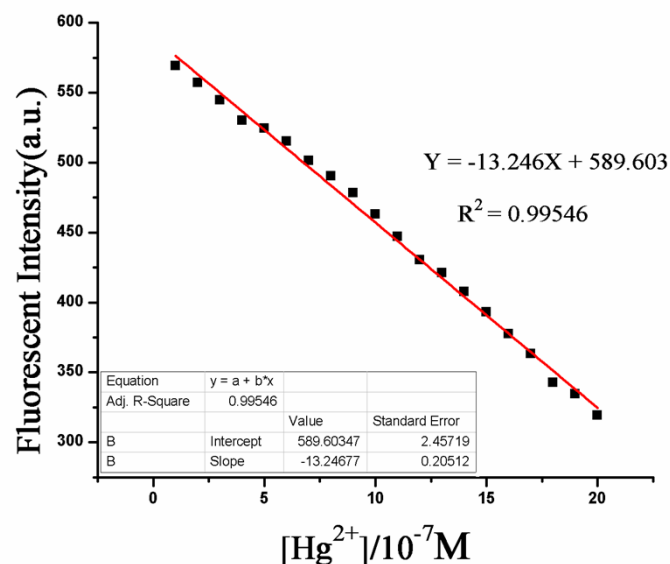

**Figure S8** Plot of the intensity at 402 nm for a mixture of  $\mathbf{Z}_1$  and  $\text{Hg}^{2+}$  in water in the range  $1.0 \times 10^{-7} - 2.0 \times 10^{-6}$  M ( $\lambda_{\text{ex}} = 343$  nm).

Linear Equation:  $Y = -13.246 \times X + 589.603$ ,  $R^2 = 0.99546$

$$K = 3\sqrt{\frac{\sum (F_0 - F_1)^2}{N - 1}}$$

$$S = 1.324 \times 10^7 \quad \delta = 0.391 \quad (N = 10)$$

$$\text{LOD} = K \times \delta / S$$

$$\text{LOD} = 8.859 \times 10^{-8} \text{ M}$$

$F_0$  is the fluorescence intensity of  $\mathbf{Z}_1$ ;  $F_1$  is the average of the  $F_0$ .

## 12. Influence of pH on $Z_1$ and $Hg^{2+}$

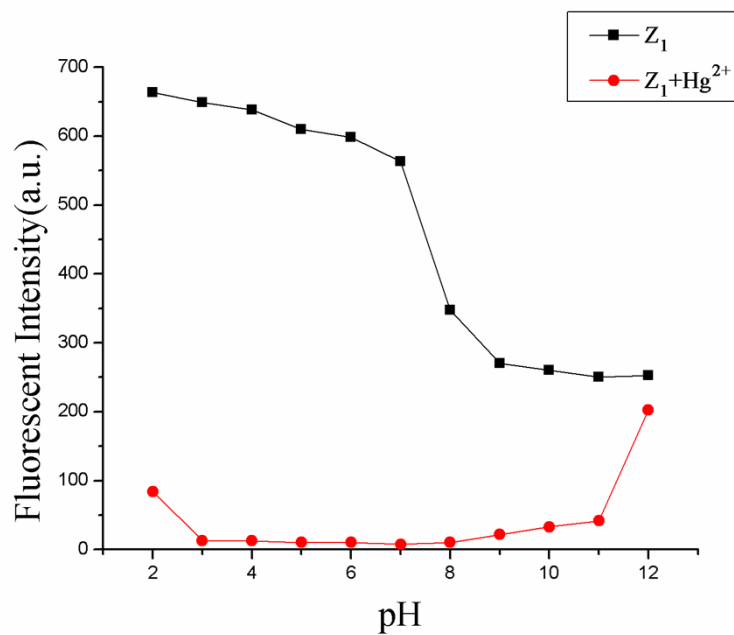

**Figure S9** Influence of pH on the fluorescence of  $Z_1$  and  $Z_1+Hg^{2+}$  in HEPES buffered solution in water.

### 13. The response of $Z_1$ to heavy metal ions in the pH range of 6.0 to 7.0

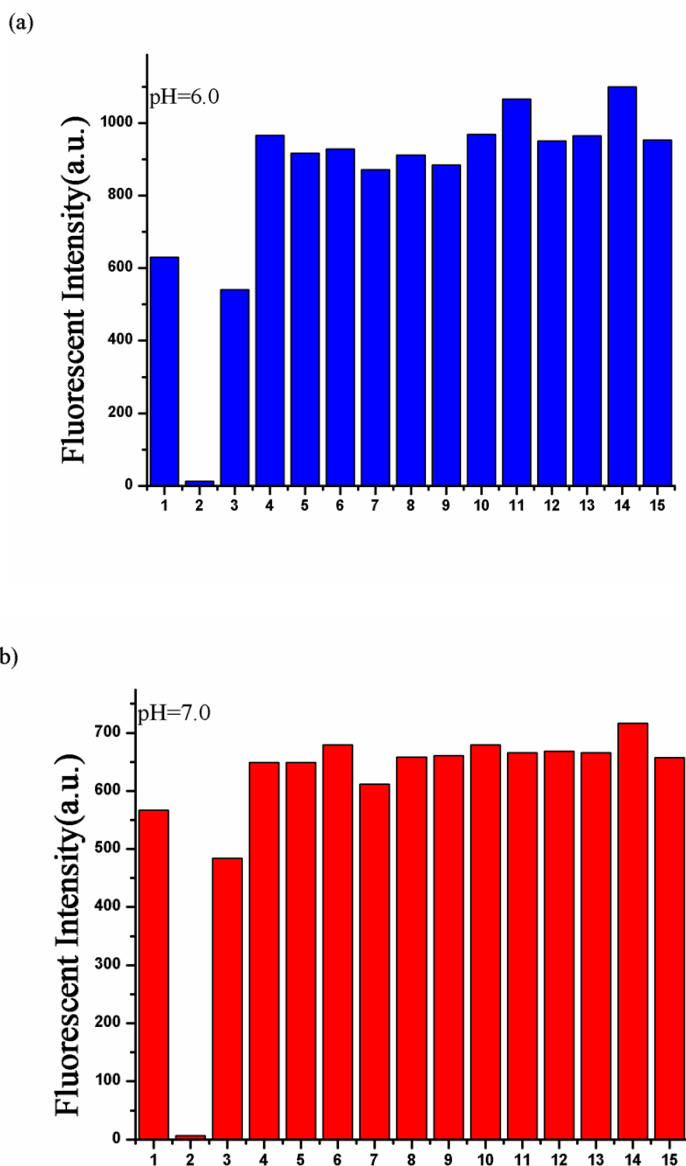

**Figure S10** The response of  $Z_1$  to heavy metal ions in the pH range of 6.0 to 7.0. Left to Right: (1) only  $Z_1$ , (2)  $Z_1 + \text{Hg}^{2+}$  (3)  $Z_1 + \text{Fe}^{3+}$  (4)  $Z_1 + \text{Ca}^{2+}$  (5)  $Z_1 + \text{Cu}^{2+}$  (6)  $Z_1 + \text{Fe}^{2+}$  (7)  $Z_1 + \text{Ag}^+$  (8)  $Z_1 + \text{Cd}^{2+}$  (9)  $Z_1 + \text{Pb}^{2+}$  (10)  $Z_1 + \text{Zn}^{2+}$  (11)  $Z_1 + \text{Cr}^{3+}$  (12)  $Z_1 + \text{Mg}^{2+}$  (13)  $Z_1 + \text{Co}^{2+}$  (14)  $Z_1 + \text{Al}^{3+}$  (15)  $Z_1 + \text{Ni}^{2+}$ .

## 14. The response of $Z_1$ to heavy metal ions in the pH range of 8.0 to 9.0

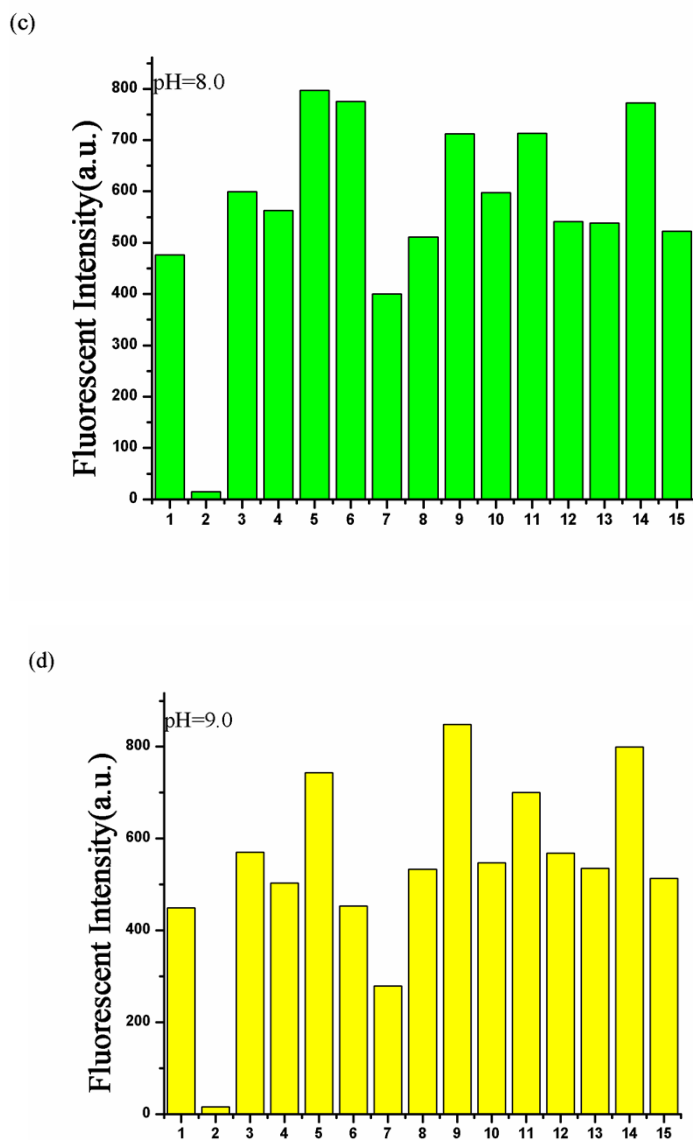

**Figure S11** The response of  $Z_1$  to heavy metal ions in the pH range of 8.0 to 9.0. Left to Right: (1)only  $Z_1$ , (2) $Z_1$ + $Hg^{2+}$  (3)  $Z_1$ + $Fe^{3+}$  (4)  $Z_1$ +  $Ca^{2+}$  (5)  $Z_1$ +  $Cu^{2+}$  (6)  $Z_1$ +  $Fe^{2+}$  (7)  $Z_1$ +  $Ag^+$  (8)  $Z_1$ +  $Cd^{2+}$  (9)  $Z_1$ +  $Pb^{2+}$  (10)  $Z_1$ +  $Zn^{2+}$  (11)  $Z_1$ +  $Cr^{3+}$  (12)  $Z_1$ +  $Mg^{2+}$  (13)  $Z_1$ +  $Co^{2+}$  (14)  $Z_1$ +  $Al^{3+}$  (15)  $Z_1$ +  $Ni^{2+}$ .



## 15. IR spectra of compound $Z_1$ and $Z_1+Hg^{2+}$

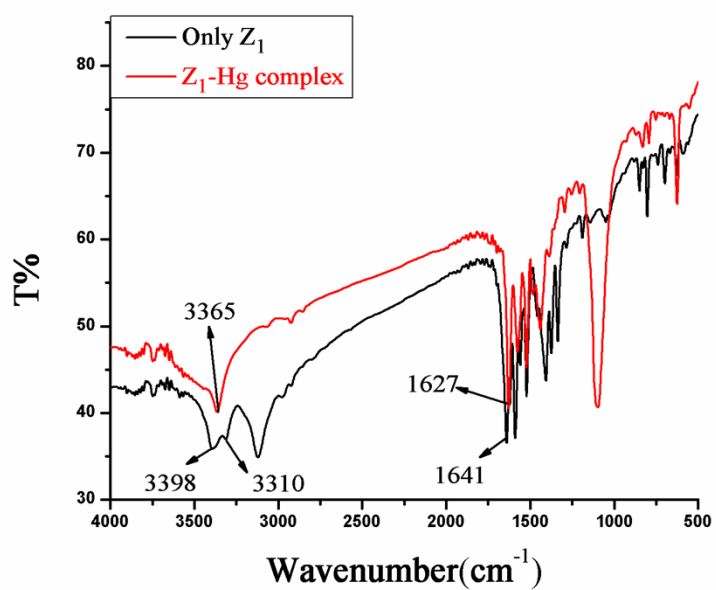

**Figure S12** IR spectra of compound  $Z_1$  and  $Z_1+Hg^{2+}$  complex in KBr disks.

## 16. ESI-MS spectrum of Z<sub>1</sub>

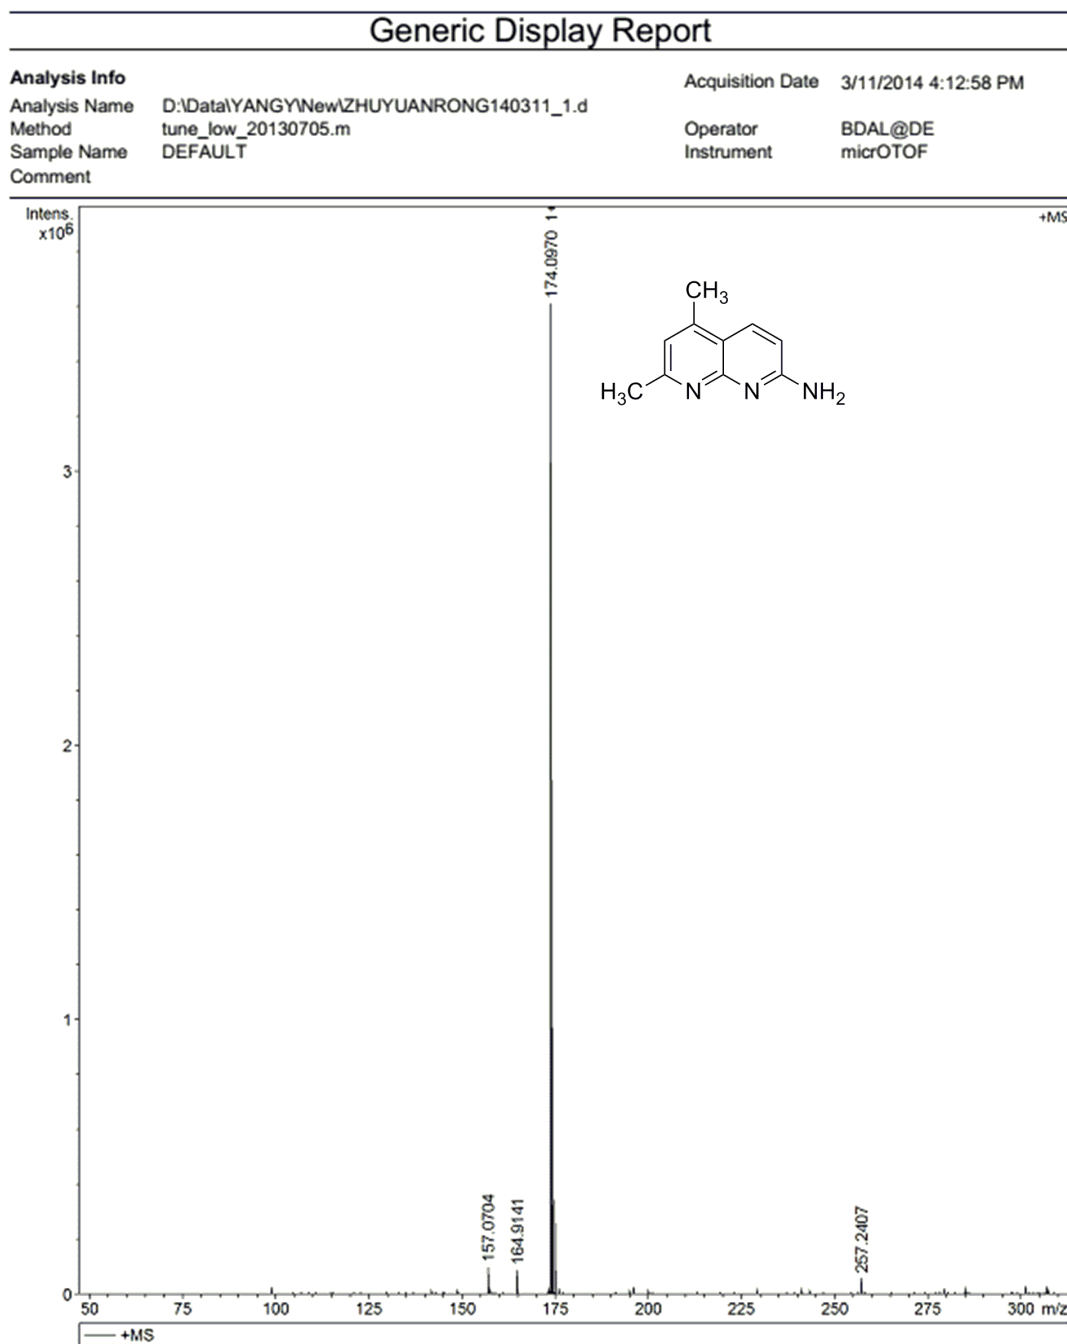

**Figure S13** ESI-MS spectrum of Z<sub>1</sub>.

# 17. ESI-MS spectrum of $Z_1 + \text{Hg}^{2+}$ complex

## Generic Display Report

|                      |                                          |                  |                      |
|----------------------|------------------------------------------|------------------|----------------------|
| <b>Analysis Info</b> |                                          | Acquisition Date | 5/12/2014 3:42:22 PM |
| Analysis Name        | D:\Data\YANGYI\New\ZHUYUANRONG140512_2.d | Operator         | BDAL@DE              |
| Method               | tune_low_20130705.m                      | Instrument       | micrOTOF             |
| Sample Name          | DEFAULT                                  |                  |                      |
| Comment              |                                          |                  |                      |

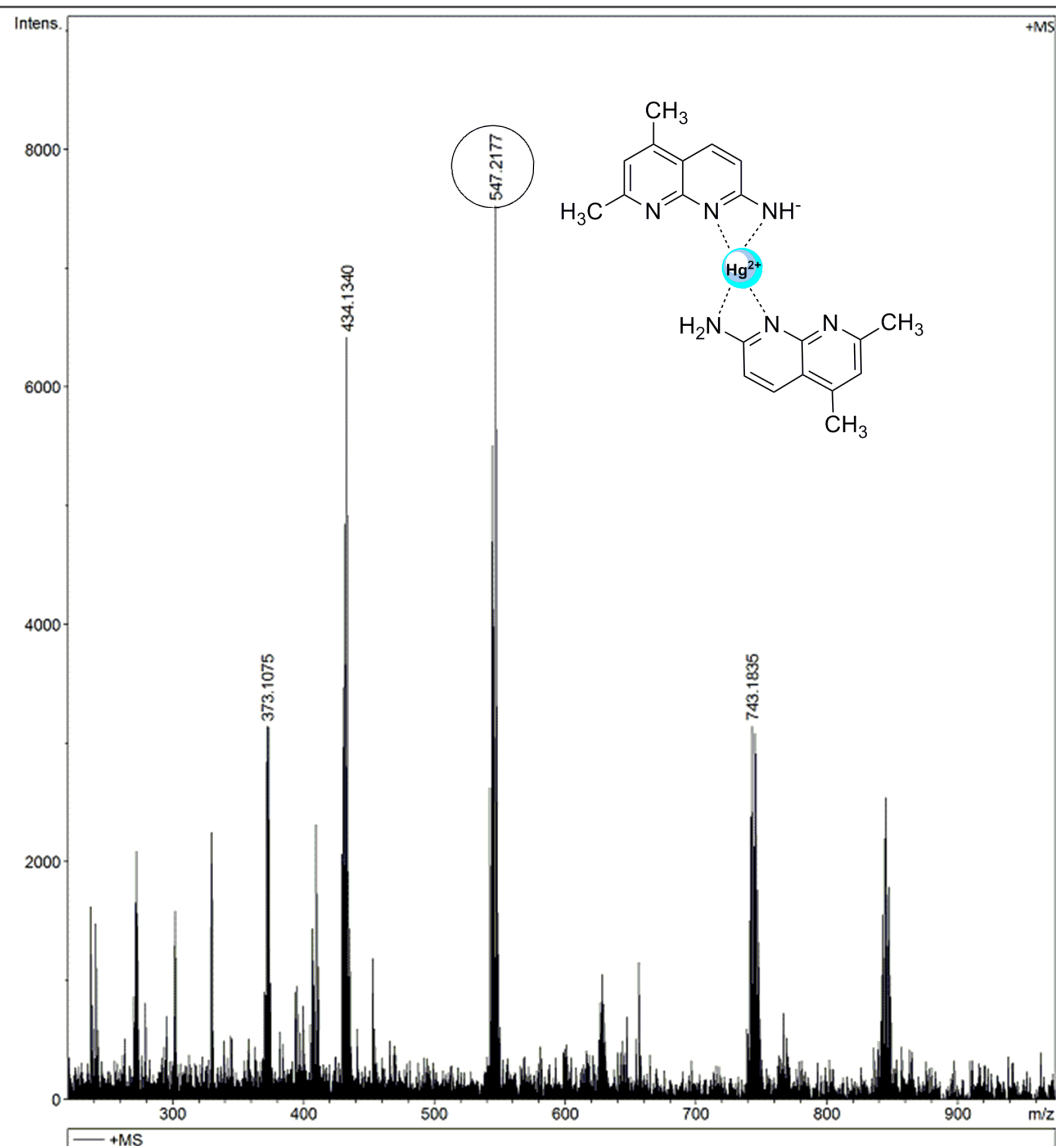

Bruker Compass DataAnalysis 4.1 printed: 5/12/2014 4:01:31 PM by: BDAL@DE Page 1 of 1

Figure S14 ESI-MS spectrum of  $Z_1 + \text{Hg}^{2+}$  complex.

## 18. The Fluorescence Intensity Changes of $Z_1$ in the Presence of $Hg^{2+}$ and $Br^-$

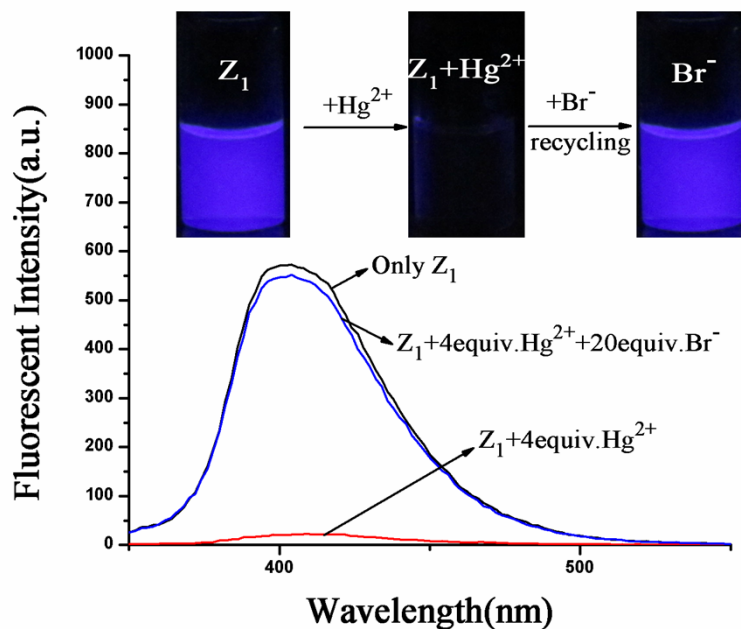

**Figure S15** Fluorescence emission spectra of  $Z_1$  (20  $\mu$ M) in the presence of  $Hg^{2+}$  (4 equiv.) or  $Br^-$  (20 equiv.) in water (PH=7.0). The excitation wavelength was 343nm. Inset: photograph from left to right shows the change in the fluorescence of only  $Z_1$ ,  $Z_1+Hg^{2+}$  (4 equiv.) and  $Z_1+Hg^{2+}$  (4 equiv.) plus  $Br^-$  (20 equiv.) in water (PH=7.0) on excitation at 365 nm.

## References

- 1 M. H. Yang, P. Thirupathi and K. H. Lee, *Org. Lett.*, 2011, **13**, 5028.
